# Supplementary material
Source: MDPI journal article supplement (https://www.mdpi.com/1099-4300/22/10/1181)
Supplement: s1 [file s1]

A dark blue outline of a house, consisting of a triangular roof and a rectangular base. The letters 'MDPI' are centered within the house.

**MDPI**
