# Supplementary material
Source: MDPI journal article supplement (https://www.mdpi.com/1099-4300/22/10/1181)

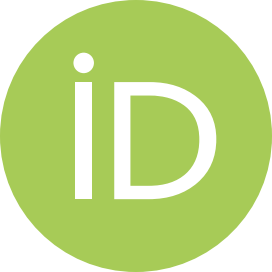

Supplement: s1 [file s1]

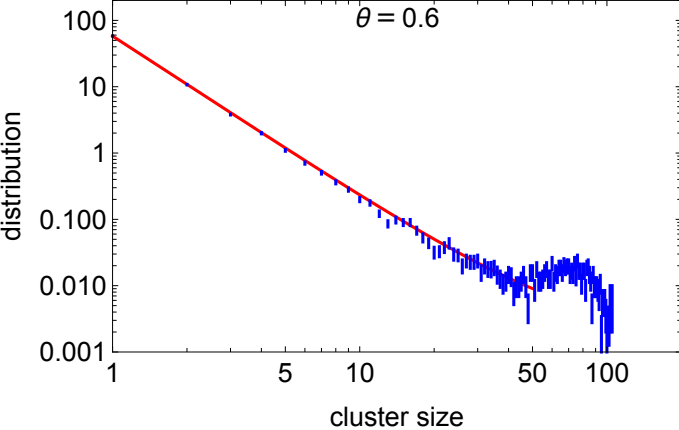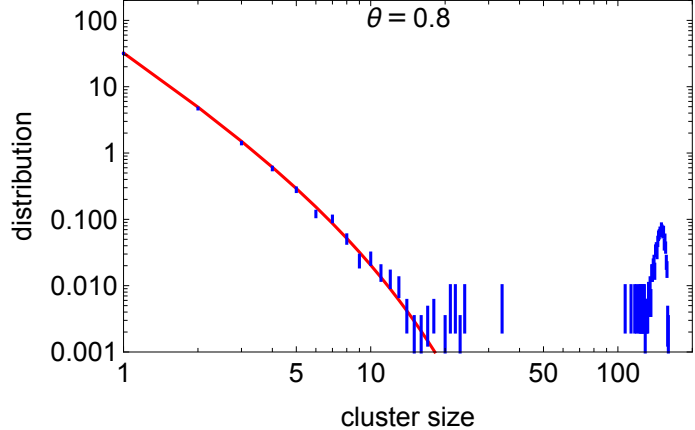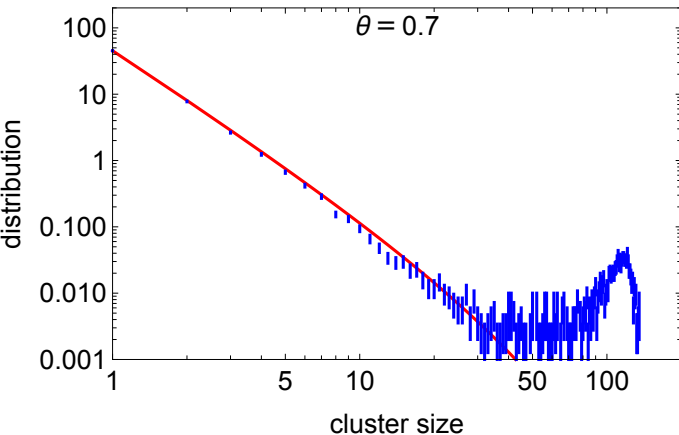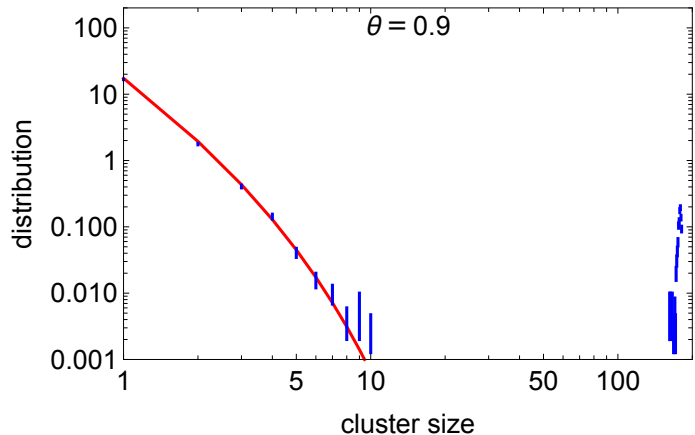

Supplement: s1 [file s1]

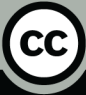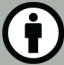

BY

Supplement: s1 [file s1]



Supplement: s1 [file s1]

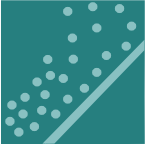

*entropy*

Supplement: s1 [file s1]

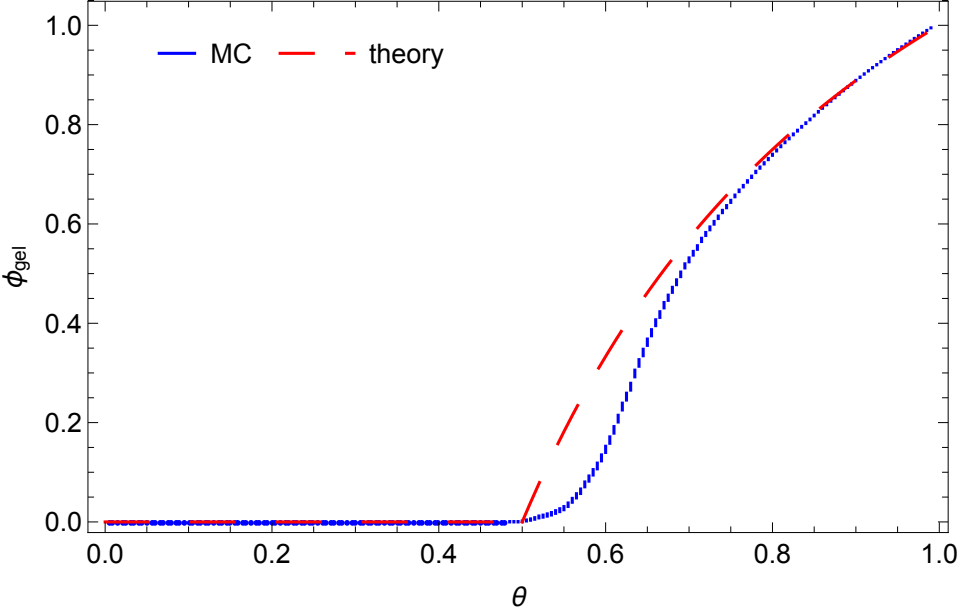

Supplement: s1 [file s1]
